# Supplementary material for: Enhanced circularly polarized luminescence of chiral Eu(iii) coordination polymers with structural strain
Source: Royal Society of Chemistry journal article supplement (doi:10.1039/d2dt03422k), 2022-12-13
Supplement: d2dt03422k1.pdf [file d2dt03422k1.pdf]

**Supporting information**

**Enhanced circularly polarized luminescence of chiral Eu(III)  
coordination polymers with structural strain**

Makoto Tsurui,<sup>1</sup> Yuichi Kitagawa,<sup>2</sup> Sunao Shoji,<sup>2,3</sup> Koji Fushimi,<sup>2</sup> and Yasuchika Hasegawa\*<sup>2,3</sup>

<sup>1</sup>Graduate School of Chemical Sciences and Engineering, Hokkaido University, Kita 13, Nishi 8, Kita-ku, Sapporo, Hokkaido 060-8628, Japan.

<sup>2</sup>Faculty of Engineering, Hokkaido University, Kita 13, Nishi 8, Kita-ku Sapporo, Hokkaido 060-8628, Japan.

<sup>3</sup>Institute for Chemical Reaction Design and Discovery (WPI-ICReDD), Hokkaido University, Kita 21, Nishi 10, Kita-ku, Sapporo, Hokkaido 001-0021, Japan.

**Corresponding author footnote:**

Tel. /Fax: +81-11-706-7114.

E-mail: hasegaway@eng.hokudai.ac.jp (Yasuchika Hasegawa)

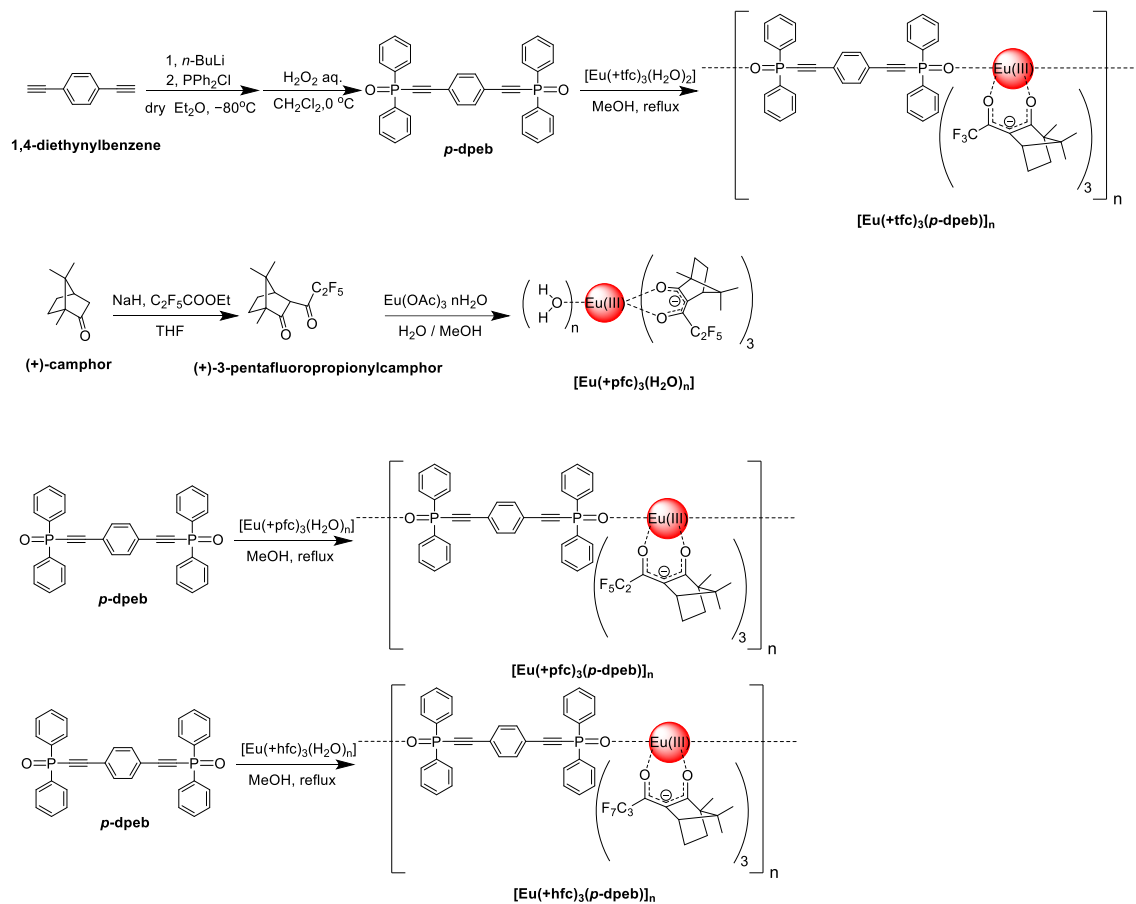

**Scheme S1.** Synthetic scheme of chiral Eu(III) coordination polymers.

**Preparation of [Eu(-tfc)<sub>3</sub>(*p*-dpeb)]<sub>n</sub>, [Eu(-pfc)<sub>3</sub>(*p*-dpeb)]<sub>n</sub>, and [Eu(-hfc)<sub>3</sub>(*p*-dpeb)]<sub>n</sub>**

[Eu(-tfc)<sub>3</sub>(*p*-dpeb)]<sub>n</sub>, [Eu(-pfc)<sub>3</sub>(*p*-dpeb)]<sub>n</sub>, and [Eu(-hfc)<sub>3</sub>(*p*-dpeb)]<sub>n</sub> were synthesized by the similar procedure to that described for the [Eu(+tfc)<sub>3</sub>(*p*-dpeb)]<sub>n</sub>, [Eu(+pfc)<sub>3</sub>(*p*-dpeb)]<sub>n</sub>, and [Eu(+hfc)<sub>3</sub>(*p*-dpeb)]<sub>n</sub>, respectively. (-)-3-Trifluoroacetylcamphor, (-)-3-(Pentafluoropropionyl)camphor, and (-)-3-(Heptafluorobutyryl)camphor were used as starting materials.

**[Eu(-tfc)<sub>3</sub>(*p*-dpeb)]<sub>n</sub>:** ESI-MS (*m/z*): [M-tfc]<sup>+</sup> calcd. for C<sub>58</sub>H<sub>52</sub>EuF<sub>6</sub>O<sub>6</sub>P<sub>2</sub>, 1173.24; found, 1173.23. Elemental analysis: calcd. for C<sub>70</sub>H<sub>66</sub>EuF<sub>9</sub>O<sub>8</sub>P<sub>2</sub>, C 59.20, H 4.68; found, C 58.93, H 4.56%.

**[Eu(-pfc)<sub>3</sub>(*p*-dpeb)]<sub>n</sub>:** ESI-MS (*m/z*): [M-pfc]<sup>+</sup> calcd. for C<sub>60</sub>H<sub>52</sub>EuF<sub>10</sub>O<sub>6</sub>P<sub>2</sub>, 1273.23; found, 1273.22. Elemental analysis: calcd. for C<sub>73</sub>H<sub>66</sub>EuF<sub>15</sub>O<sub>8</sub>P<sub>2</sub>, C 55.84, H 4.24; found, C 55.59, H 4.14%.

**[Eu(-hfc)<sub>3</sub>(*p*-dpeb)]<sub>n</sub>:** ESI-MS (*m/z*): [M-hfc]<sup>+</sup> calcd. for C<sub>62</sub>H<sub>52</sub>EuF<sub>14</sub>O<sub>6</sub>P<sub>2</sub>, 1373.22; found, 1373.24. Elemental analysis: calcd. for C<sub>76</sub>H<sub>66</sub>EuF<sub>21</sub>O<sub>8</sub>P<sub>2</sub>, C 53.06, H 3.87; found, C 52.32, H 3.82%.

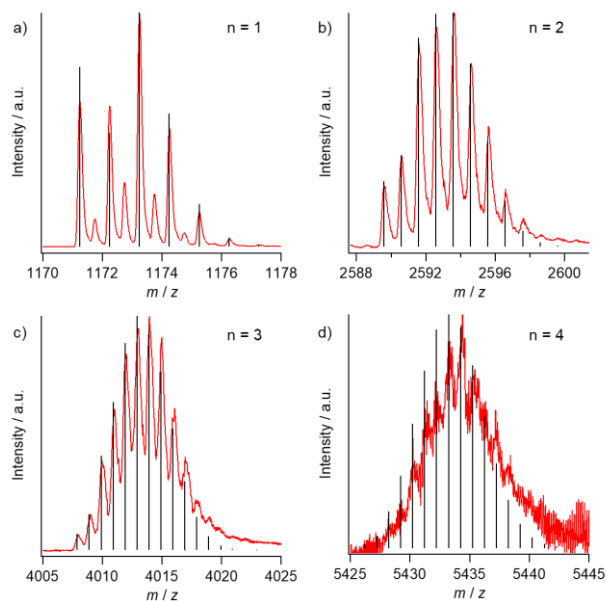

**Figure S1.** ESI-MS spectra (red) and simulated mass pattern (black) of  $[\text{Eu}_n(+\text{tfc})_{3n-1}(\text{p-dpeb})_n]^+$  (a)  $n = 1$ , b)  $n = 2$ , c)  $n = 3$ , d)  $n = 4$ ).

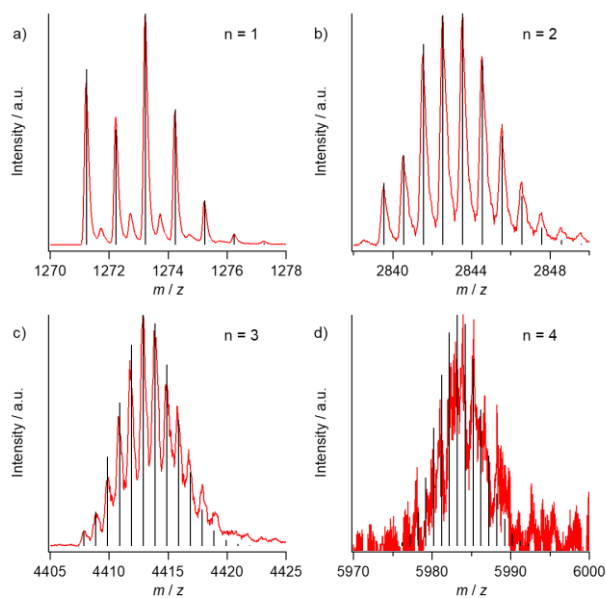

**Figure S2.** ESI-MS spectra (red) and simulated mass pattern (black) of  $[\text{Eu}_n(+\text{pfc})_{3n-1}(\text{p-dpeb})_n]^+$  (a)  $n = 1$ , b)  $n = 2$ , c)  $n = 3$ , d)  $n = 4$ ).

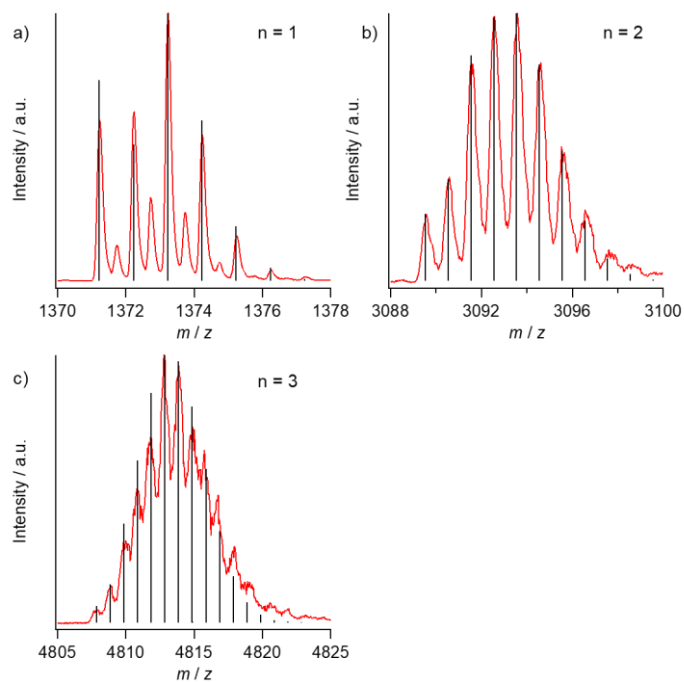

**Figure S3.** ESI-MS spectra (red) and simulated mass pattern (black) of  $[\text{Eu}_n(+\text{hfc})_{3n-1}(\text{p-dpeb})_n]^+$  (a)  $n = 1$ , b)  $n = 2$ , c)  $n = 3$ ).

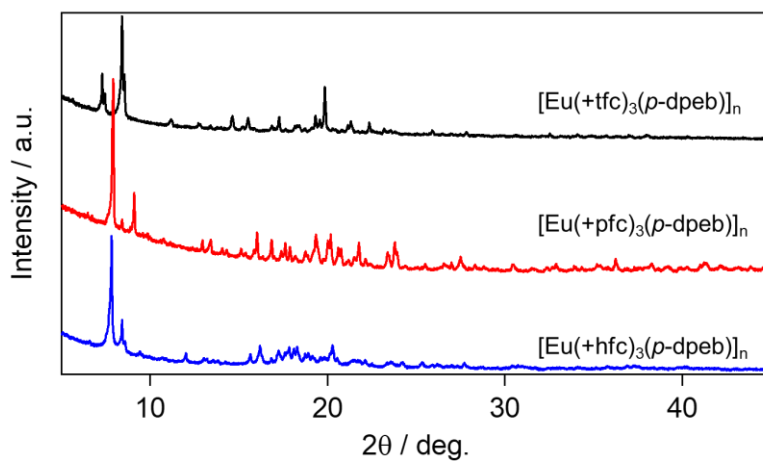

**Figure S4.** PXRD patterns of  $[\text{Eu}(+\text{tfc})_3(\text{p-dpeb})]_n$  (black),  $[\text{Eu}(+\text{pfc})_3(\text{p-dpeb})]_n$  (red), and  $[\text{Eu}(+\text{hfc})_3(\text{p-dpeb})]_n$  (blue).

**Table S1.** Crystallographic data of chiral Eu(III) coordination polymers.

| Compounds                              | [Eu(+pfc) <sub>3</sub> ( <i>p</i> -dpeb)] <sub>n</sub>                          | [Eu(+hfc) <sub>3</sub> ( <i>p</i> -dpeb)] <sub>n</sub>                          |
|----------------------------------------|---------------------------------------------------------------------------------|---------------------------------------------------------------------------------|
| Chemical formula                       | C <sub>73</sub> H <sub>66</sub> EuF <sub>15</sub> O <sub>8</sub> P <sub>2</sub> | C <sub>76</sub> H <sub>66</sub> EuF <sub>21</sub> O <sub>8</sub> P <sub>2</sub> |
| Crystal system                         | orthorhombic                                                                    | orthorhombic                                                                    |
| Space group                            | P2 <sub>1</sub> 2 <sub>1</sub> 2 <sub>1</sub>                                   | P2 <sub>1</sub> 2 <sub>1</sub> 2 <sub>1</sub>                                   |
| <i>a</i> / Å                           | 17.7325(3)                                                                      | 17.6036(3)                                                                      |
| <i>b</i> / Å                           | 19.2862(3)                                                                      | 20.5986(5)                                                                      |
| <i>c</i> / Å                           | 21.0290(3)                                                                      | 20.7174(5)                                                                      |
| β / deg.                               | 90                                                                              | 90                                                                              |
| Volume / Å <sup>3</sup>                | 7191.76(19)                                                                     | 7512.3(3)                                                                       |
| Z                                      | 4                                                                               | 4                                                                               |
| ρ <sub>calc</sub> / g cm <sup>-3</sup> | 1.450                                                                           | 1.521                                                                           |
| Temperature / K                        | 123                                                                             | 123                                                                             |
| μ (Mo Kα) / mm <sup>-1</sup>           | 1.009                                                                           | 0.984                                                                           |
| max 2θ / deg.                          | 62.164                                                                          | 61.978                                                                          |
| No. of reflns collected                | 67773                                                                           | 57738                                                                           |
| No. of independent reflns              | 17870                                                                           | 19014                                                                           |
| R <sub>1</sub>                         | 0.0576                                                                          | 0.0648                                                                          |
| wR <sub>2</sub>                        | 0.1546                                                                          | 0.1828                                                                          |
| Flack parameter                        | -0.004(7)                                                                       | 0.000(6)                                                                        |

The CShM factor ( $S_{\text{CShM}}$ ) expresses the degree of deviation from the ideal coordination structure and is determined using the following equation:

$$S_{\text{CShM}} = \min \frac{\sum_k^N |Q_k - P_k|^2}{\sum_k^N |Q_k - Q_0|^2} \times 100 \quad (\text{S1})$$

where  $N$ ,  $Q_k$ ,  $Q_0$ , and  $P_k$  are the number of vertices, vertices of the actual structure, position vectors of the geometrical center, and vertices of the ideal structure, respectively.

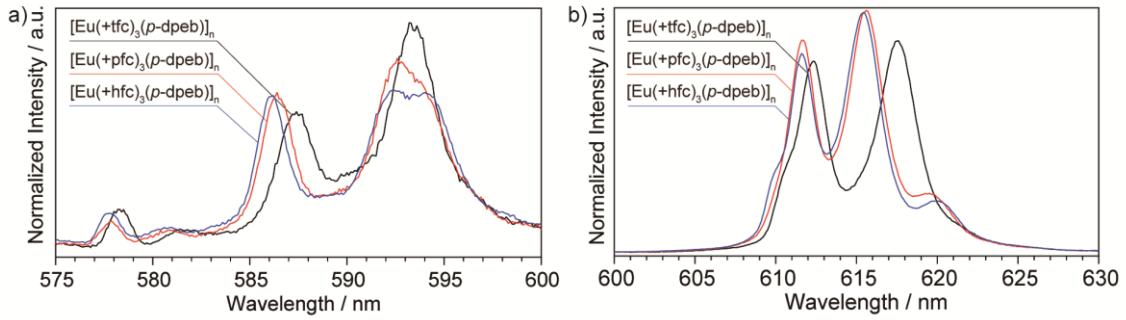

**Figure S5.** Emission spectra ( $\lambda_{\text{ex}} = 360$  nm) of a)  $[\text{Eu}(+\text{tfc})_3(\text{p-dpeb})]_n$  (black),  $[\text{Eu}(+\text{pfc})_3(\text{p-dpeb})]_n$  (red), and  $[\text{Eu}(+\text{hfc})_3(\text{p-dpeb})]_n$  (blue) expanded in the region of  ${}^5\text{D}_0 \rightarrow {}^7\text{F}_{0,1}$  (left) and  ${}^5\text{D}_0 \rightarrow {}^7\text{F}_2$  (right) transitions.

The temperature-dependent emission lifetimes in the solid state measured in the range of 150–350 K are shown in Figure S6a. The energy transfer rate constants ( $k_{\text{EnT}}$ ) between Eu(III) and LMCT states were estimated using kinetic Arrhenius analysis (Figure S6b). The  $k_{\text{EnT}}$  was defined by the following equation:<sup>S1–S3</sup>

$$\ln\left(\frac{1}{\tau_{\text{obs}}} - \frac{1}{\tau_{150\text{K}}}\right) = \ln k_{\text{EnT}} = \ln A - \frac{\Delta E_a}{RT} \quad (\text{S2})$$

where  $\tau_{\text{obs}}$ ,  $\tau_{150\text{K}}$ ,  $A$ ,  $\Delta E_a$ ,  $R$ , and  $T$  are the observed emission lifetime, standard emission lifetime at 150 K, frequency factor, activation energy, gas constant, and temperature, respectively. The calculated  $\Delta E_a$  and  $A$  values are summarized in Table S2. The Arrhenius plots were well fitted to the equation (S1) with high coefficient of determination ( $R^2 = 0.996$  ( $[\text{Eu}(\text{+pfc})_3(\text{p-dpeb})]_n$ ), and  $0.999$  ( $[\text{Eu}(\text{+hfc})_3(\text{p-dpeb})]_n$ )), indicating the single temperature-dependent quenching state.

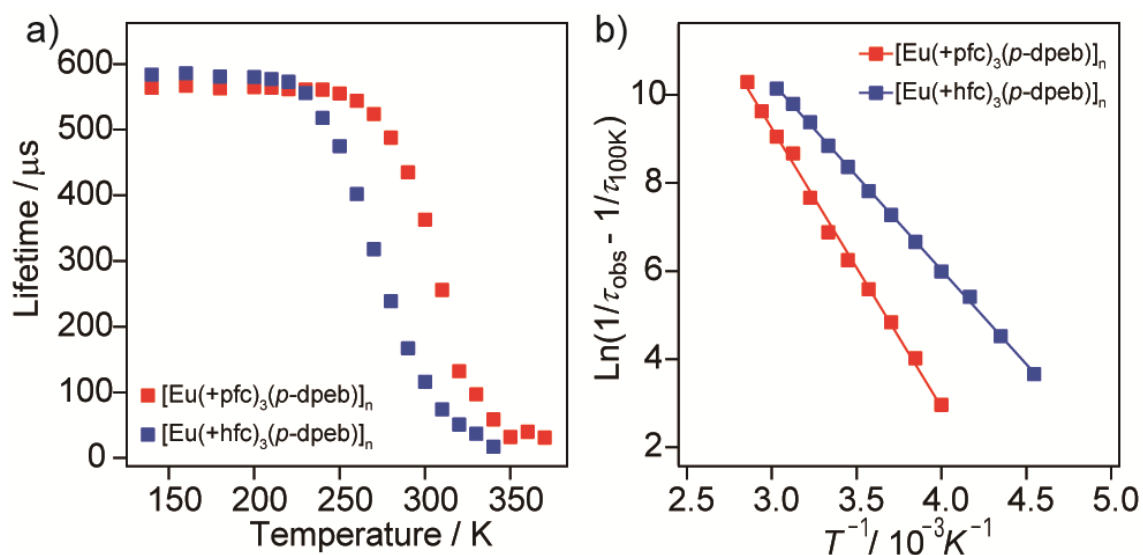

**Figure S6.** a) Temperature-dependent emission lifetimes and b) Arrhenius plots of  $[\text{Eu}(\text{+pfc})_3(\text{p-dpeb})]_n$  (red) and  $[\text{Eu}(\text{+hfc})_3(\text{p-dpeb})]_n$  (blue) ( $\lambda_{\text{ex}} = 355 \text{ nm}$ ,  $\lambda_{\text{em}} = 610 \text{ nm}$ ). c) Selected  $\alpha$ -spin molecular orbitals of  $[\text{Eu}(\text{+pfc})_3(\text{p-dpeb})]_n$  and  $[\text{Eu}(\text{+hfc})_3(\text{p-dpeb})]_n$ .



**Table S2.** Arrhenius parameters of chiral Eu(III) coordination polymers.

| Compounds                                     | $\Delta E_a / \text{cm}^{-1}$ | $A / \text{s}^{-1}$  |
|-----------------------------------------------|-------------------------------|----------------------|
| $[\text{Eu}(+\text{pfc})_3(p\text{-dpeb})]_n$ | $4.4 \times 10^3$             | $4.0 \times 10^{11}$ |
| $[\text{Eu}(+\text{hfc})_3(p\text{-dpeb})]_n$ | $3.0 \times 10^3$             | $1.1 \times 10^{10}$ |

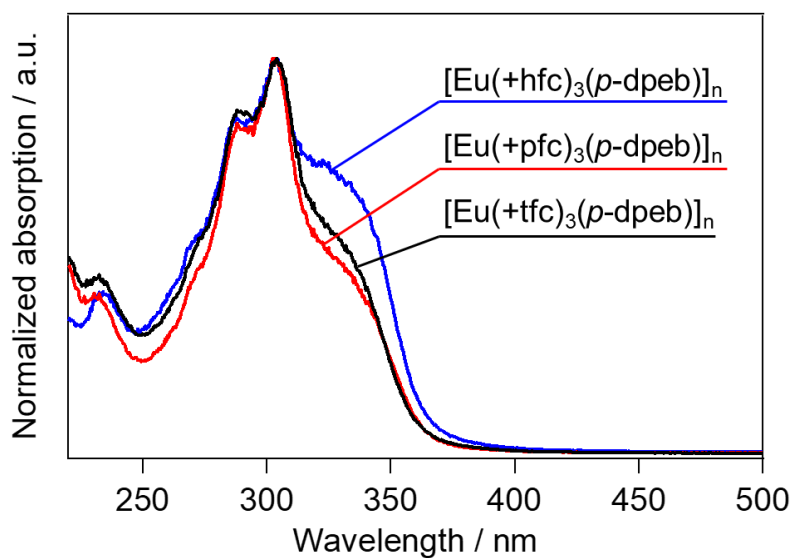

**Figure S7.** Diffuse reflection spectra of  $[\text{Eu}(+\text{tfc})_3(p\text{-dpeb})]_n$  (black),  $[\text{Eu}(+\text{pfc})_3(p\text{-dpeb})]_n$  (red), and  $[\text{Eu}(+\text{hfc})_3(p\text{-dpeb})]_n$  (blue).

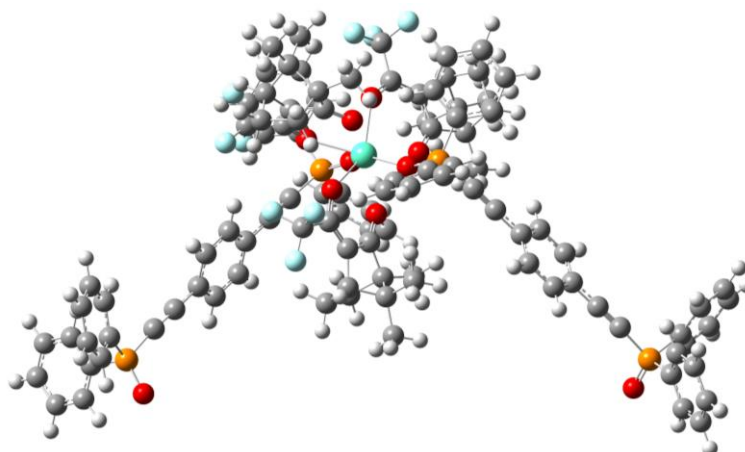

**Figure S8.** Optimized structure of  $[\text{Eu}(+\text{tfc})_3(\text{p-dpeb})_2]$  obtained by DFT calculations.

**Table S3.** Cartesian coordinates (in Å) of  $[\text{Eu}(+\text{tfc})_3(\text{p-dpeb})_2]$  for optimized structure obtained by DFT calculations.

| Atom | X        | Y        | Z        | Atom | X        | Y        | Z        |
|------|----------|----------|----------|------|----------|----------|----------|
| P    | -9.19144 | 6.46651  | 0.060322 | H    | 4.269938 | -1.41087 | 1.588213 |
| P    | -1.73203 | -1.82383 | 3.306254 | H    | 5.213164 | -2.16582 | 2.895127 |
| O    | -8.49847 | 7.781126 | -0.14049 | C    | 5.709428 | 0.957488 | -1.48149 |
| C    | -11.5897 | 7.929844 | 3.017292 | C    | 3.99269  | -5.69766 | 1.15331  |
| H    | -11.7295 | 8.893318 | 3.500071 | H    | 4.751975 | -6.39063 | 1.532707 |
| C    | -4.63744 | 1.27532  | 2.179704 | H    | 3.64865  | -6.08255 | 0.190533 |
| C    | -10.0071 | 5.846056 | -1.44979 | C    | 0.594008 | -5.06216 | 0.763562 |
| C    | -10.4522 | 6.551627 | 1.381444 | C    | -1.71186 | 0.858623 | -1.36092 |
| C    | -10.2946 | 4.49232  | -1.67385 | C    | 2.804381 | -5.54233 | 2.147546 |
| H    | -9.98789 | 3.742445 | -0.94974 | H    | 2.44606  | -6.48076 | 2.576663 |
| C    | -8.14622 | 5.125639 | 0.560394 | C    | -2.55008 | -3.80656 | -3.96462 |
| C    | -3.71372 | 0.274856 | 2.597052 | C    | 9.813183 | 4.12604  | 0.221181 |
| C    | -5.38555 | 1.097582 | 0.997373 | C    | 12.27974 | 4.065834 | 1.612245 |
| H    | -5.26891 | 0.190066 | 0.417034 | C    | 0.68665  | 3.509383 | -0.33214 |
| C    | -7.35857 | 4.265651 | 0.913279 | C    | 2.329699 | -4.05394 | 4.225561 |
| C    | -12.3592 | 6.832652 | 3.4075   | H    | 2.740093 | -3.26454 | 4.866716 |
| H    | -13.1007 | 6.94063  | 4.194766 | H    | 2.061448 | -4.89546 | 4.876707 |
| C    | -4.80466 | 2.454309 | 2.934729 | H    | 1.409981 | -3.67147 | 3.776299 |
| H    | -4.22672 | 2.591698 | 3.84301  | C    | 2.212574 | -0.39366 | -6.68836 |
| C    | -6.272   | 2.081628 | 0.581453 | H    | 2.872556 | -0.41024 | -7.55135 |
| H    | -6.838   | 1.948315 | -0.33455 | C    | 1.889228 | 2.349745 | 1.748417 |
| C    | -10.6369 | 7.792045 | 2.005681 | H    | 1.687275 | 1.681995 | 2.592606 |
| H    | -10.0277 | 8.634013 | 1.691208 | H    | 2.277292 | 3.293773 | 2.148884 |
| C    | -6.44362 | 3.259229 | 1.336767 | H    | 2.674219 | 1.880598 | 1.145628 |
| C    | -2.92964 | -0.59434 | 2.932619 | C    | 6.497938 | 0.572889 | -0.37791 |
| C    | -0.87057 | -1.19095 | 4.781109 | H    | 6.278413 | -0.35839 | 0.134045 |
| C    | -10.9497 | 4.099939 | -2.84151 | C    | -4.50594 | -3.79038 | -2.79576 |
| H    | -11.1658 | 3.048873 | -3.013   | H    | -5.43002 | -4.16658 | -2.35313 |
| C    | -5.69822 | 3.431956 | 2.521124 | C    | -2.80091 | 1.288586 | -2.3539  |

|    |          |          |          |   |          |          |          |
|----|----------|----------|----------|---|----------|----------|----------|
| H  | -5.8269  | 4.338765 | 3.102921 | C | 0.159907 | -6.53858 | 0.779095 |
| C  | -11.2269 | 5.45159  | 1.776667 | C | 4.539625 | -4.2404  | 1.058317 |
| H  | -11.0897 | 4.484369 | 1.300721 | H | 4.47224  | -3.82789 | 0.046435 |
| C  | -2.64857 | -3.32031 | 3.759744 | H | 5.591569 | -4.17849 | 1.360059 |
| C  | 0.348583 | -0.52544 | 4.580312 | C | 4.261542 | -3.52152 | -3.20369 |
| H  | 0.745927 | -0.4349  | 3.573448 | H | 4.979328 | -2.71311 | -3.31087 |
| C  | -12.1772 | 5.593106 | 2.786775 | C | -1.53324 | 3.748579 | 0.632793 |
| H  | -12.7753 | 4.738194 | 3.090611 | H | -1.63541 | 4.838256 | 0.675965 |
| C  | 1.037235 | 0.002352 | 5.673468 | H | -2.5378  | 3.324671 | 0.708903 |
| H  | 1.981041 | 0.517817 | 5.517567 | C | 11.80664 | 5.965342 | -0.59804 |
| C  | -11.021  | 6.403584 | -3.57925 | C | -0.56896 | 3.216539 | 1.736649 |
| H  | -11.2942 | 7.145966 | -4.32422 | H | -1.03857 | 2.475733 | 2.392434 |
| C  | -2.67334 | -5.73834 | 3.88334  | H | -0.19738 | 4.022102 | 2.379705 |
| H  | -2.18744 | -6.68889 | 3.686065 | C | 12.56986 | 4.230279 | 2.972913 |
| C  | -11.3164 | 5.055376 | -3.79261 | H | 12.06178 | 5.013088 | 3.527827 |
| H  | -11.8235 | 4.747319 | -4.70309 | C | 4.681828 | -4.84535 | -3.33543 |
| C  | -2.02049 | -4.55482 | 3.54042  | H | 5.722258 | -5.06135 | -3.5622  |
| H  | -1.03651 | -4.59039 | 3.086345 | C | -3.26726 | -6.07467 | -2.89135 |
| C  | -3.9473  | -5.69342 | 4.453749 | H | -2.63968 | -6.71617 | -3.52265 |
| H  | -4.45682 | -6.61635 | 4.717512 | H | -4.14148 | -6.66787 | -2.5948  |
| C  | -10.3667 | 6.800139 | -2.41237 | H | -2.70331 | -5.84132 | -1.98434 |
| H  | -10.1139 | 7.842937 | -2.24552 | C | 13.49964 | 3.393974 | 3.594357 |
| C  | -3.93367 | -3.278   | 4.318053 | H | 13.72208 | 3.523868 | 4.650011 |
| H  | -4.43985 | -2.32618 | 4.451017 | C | 0.078014 | 0.167605 | -5.68997 |
| C  | -4.57611 | -4.46493 | 4.671383 | H | -0.91834 | 0.592353 | -5.76466 |
| H  | -5.57436 | -4.43087 | 5.098862 | C | 12.95272 | 7.886589 | -1.53011 |
| C  | -1.38792 | -1.33079 | 6.076128 | H | 13.35743 | 8.88796  | -1.41158 |
| H  | -2.32165 | -1.86173 | 6.238749 | C | 0.928803 | 0.151159 | -6.79605 |
| C  | 0.517503 | -0.1336  | 6.962998 | H | 0.593891 | 0.561226 | -7.74515 |
| H  | 1.05771  | 0.276138 | 7.812355 | C | -3.54469 | -2.93494 | -0.49303 |
| C  | -0.69314 | -0.80122 | 7.163922 | C | 12.33488 | 7.255879 | -0.44966 |
| H  | -1.09338 | -0.91538 | 8.167594 | H | 12.24095 | 7.761053 | 0.506971 |
| Eu | -0.39327 | -1.98933 | -0.11325 | C | 13.04359 | 7.23553  | -2.76239 |
| P  | 2.307823 | -1.53709 | -2.73721 | H | 13.52323 | 7.728765 | -3.60363 |
| P  | 11.0548  | 5.208037 | 0.881819 | C | 1.645149 | 3.009961 | -1.4281  |
| O  | 0.246398 | 0.155438 | 0.715752 | H | 2.6874   | 3.07914  | -1.09315 |
| F  | 1.122215 | -7.34245 | 0.259232 | H | 1.547916 | 3.633409 | -2.32601 |
| O  | 10.55702 | 6.214951 | 1.874901 | H | 1.454722 | 1.974226 | -1.72074 |
| O  | 1.184283 | -1.3942  | -1.73797 | C | -3.34055 | -2.57517 | -4.54142 |
| O  | -0.17708 | -4.28037 | 0.12209  | H | -3.4762  | -2.69862 | -5.62196 |
| F  | -5.7889  | -2.11244 | -0.56651 | H | -2.78922 | -1.64282 | -4.38958 |
| F  | -0.96249 | -6.75102 | 0.083921 | C | -3.71532 | -4.82293 | -3.66785 |
| O  | 1.791263 | -2.35834 | 0.836142 | C | -3.43267 | -3.35374 | -1.80604 |
| F  | -3.02525 | 2.617448 | -2.40544 | C | -2.20614 | -3.35546 | -2.53808 |
| F  | -4.94921 | -2.48537 | 1.400508 | C | 4.613129 | -4.97704 | 3.940677 |
| O  | -1.64629 | -0.40923 | -1.25824 | H | 5.438108 | -5.28763 | 3.295278 |
| O  | -1.05555 | -3.01443 | -2.16895 | H | 4.357507 | -5.83002 | 4.582036 |
| O  | -2.61019 | -2.54057 | 0.274011 | H | 4.9884   | -4.18102 | 4.595258 |
| C  | 0.006772 | 1.320197 | 0.320347 | C | 0.50521  | -0.35965 | -4.46921 |
| F  | -2.47555 | 0.891653 | -3.61356 | H | -0.15389 | -0.36296 | -3.60847 |
| C  | 2.434852 | -5.60968 | -2.8566  | C | -4.95179 | -2.92952 | 0.133997 |
| H  | 1.729711 | -6.42036 | -2.69693 | C | 11.88842 | 5.320747 | -1.84044 |
| C  | 7.822436 | 2.595653 | -0.60285 | H | 11.44997 | 4.335356 | -1.97341 |
| C  | 1.794239 | -0.8984  | -4.35935 | C | 1.056267 | 4.972818 | -0.03325 |
| C  | 1.755171 | -4.70825 | 1.425341 | H | 0.476324 | 5.422361 | 0.775911 |
| C  | 2.919202 | -3.23935 | -2.90763 | H | 0.903    | 5.587672 | -0.92915 |
| C  | 3.36413  | -4.50181 | 3.178322 | H | 2.115838 | 5.053307 | 0.237976 |

|   |          |          |          |   |          |          |          |
|---|----------|----------|----------|---|----------|----------|----------|
| C | 2.647982 | -0.91697 | -5.47229 | C | -1.37146 | -4.25761 | -4.8094  |
| H | 3.646624 | -1.33908 | -5.39382 | H | -1.6976  | -4.53891 | -5.81776 |
| C | 3.728571 | -0.58501 | -2.30524 | H | -0.86144 | -5.11968 | -4.36462 |
| C | 0.626329 | 2.580932 | 0.937277 | H | -0.63441 | -3.45336 | -4.9063  |
| C | 8.892045 | 3.423997 | -0.15682 | C | 12.50816 | 5.954562 | -2.91802 |
| C | 7.030738 | 2.981351 | -1.70377 | H | 12.56591 | 5.452732 | -3.88018 |
| H | 7.24173  | 3.919075 | -2.20735 | C | -4.69679 | -2.59446 | -3.77455 |
| C | -0.90851 | 1.765186 | -0.69194 | H | -4.87753 | -1.66624 | -3.22731 |
| C | -0.82611 | 3.287965 | -0.67545 | H | -5.54428 | -2.75249 | -4.45114 |
| H | -1.17256 | 3.791274 | -1.5781  | C | -4.47435 | -5.30325 | -4.91695 |
| C | 4.638599 | 0.128941 | -1.9232  | H | -4.80513 | -4.49505 | -5.57342 |
| C | 3.769684 | -5.88894 | -3.15906 | H | -5.36473 | -5.87072 | -4.6176  |
| H | 4.101641 | -6.91969 | -3.25026 | H | -3.84695 | -5.9768  | -5.51353 |
| C | 2.279538 | -3.37791 | 1.373024 | C | 12.9275  | 3.061601 | 0.878477 |
| C | 7.539887 | 1.380917 | 0.054686 | H | 12.71263 | 2.928363 | -0.1784  |
| H | 8.143854 | 1.085169 | 0.90623  | C | 14.14128 | 2.394503 | 2.861133 |
| C | 5.988894 | 2.173615 | -2.13766 | H | 14.86538 | 1.744596 | 3.345338 |
| H | 5.379015 | 2.474033 | -2.9834  | C | 13.85515 | 2.228806 | 1.502597 |
| C | 2.001151 | -4.28812 | -2.73684 | H | 14.35593 | 1.452148 | 0.930852 |
| H | 0.962604 | -4.07215 | -2.50346 | O | -0.7114  | -2.06543 | 2.210701 |
| C | 3.650719 | -3.42396 | 2.064421 | F | -3.97831 | 0.7001   | -2.04976 |
| C | 4.210037 | -2.06933 | 2.462166 | F | -5.51755 | -4.15789 | 0.136967 |
| H | 3.567286 | -1.56882 | 3.194749 | F | -0.06153 | -6.97015 | 2.052854 |

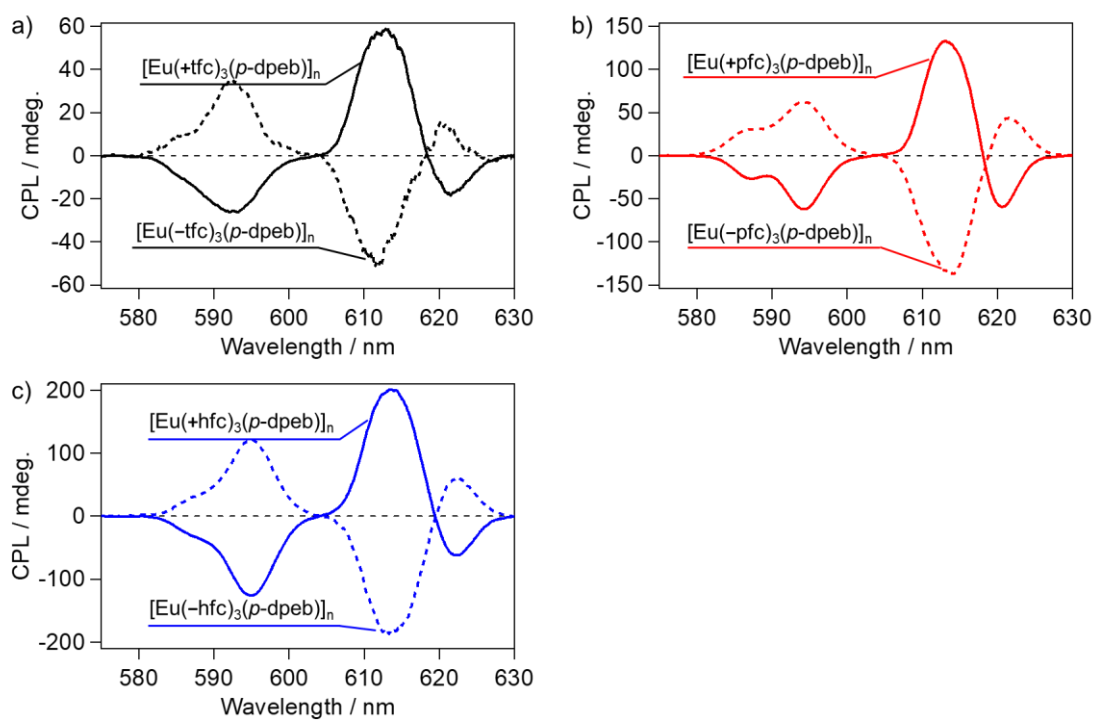

**Figure S9.** CPL spectra of a)  $[\text{Eu}(+\text{tfc})_3(\text{p-dpeb})]_n$  (solid) and  $[\text{Eu}(-\text{tfc})_3(\text{p-dpeb})]_n$  (dotted), b)  $[\text{Eu}(+\text{pfc})_3(\text{p-dpeb})]_n$  (solid) and  $[\text{Eu}(-\text{pfc})_3(\text{p-dpeb})]_n$  (dotted), and c)  $[\text{Eu}(+\text{hfc})_3(\text{p-dpeb})]_n$  (solid) and  $[\text{Eu}(-\text{hfc})_3(\text{p-dpeb})]_n$  (dotted).

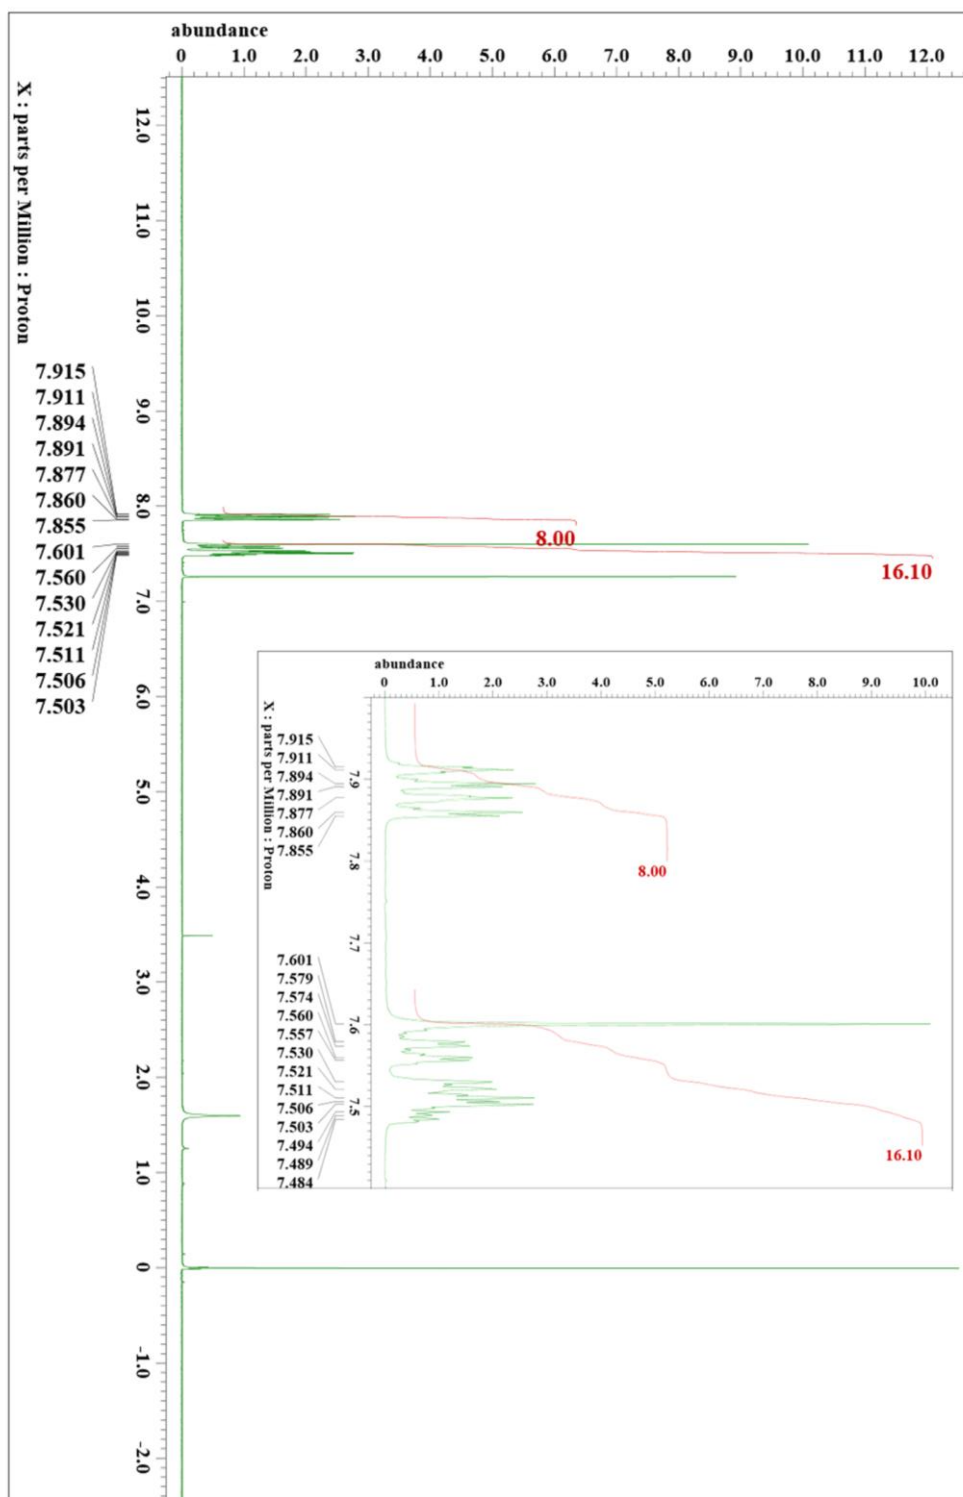

**Figure S10.** <sup>1</sup>H NMR spectra of *p*-dpeb in CDCl<sub>3</sub> with TMS as an internal standard (400 MHz).

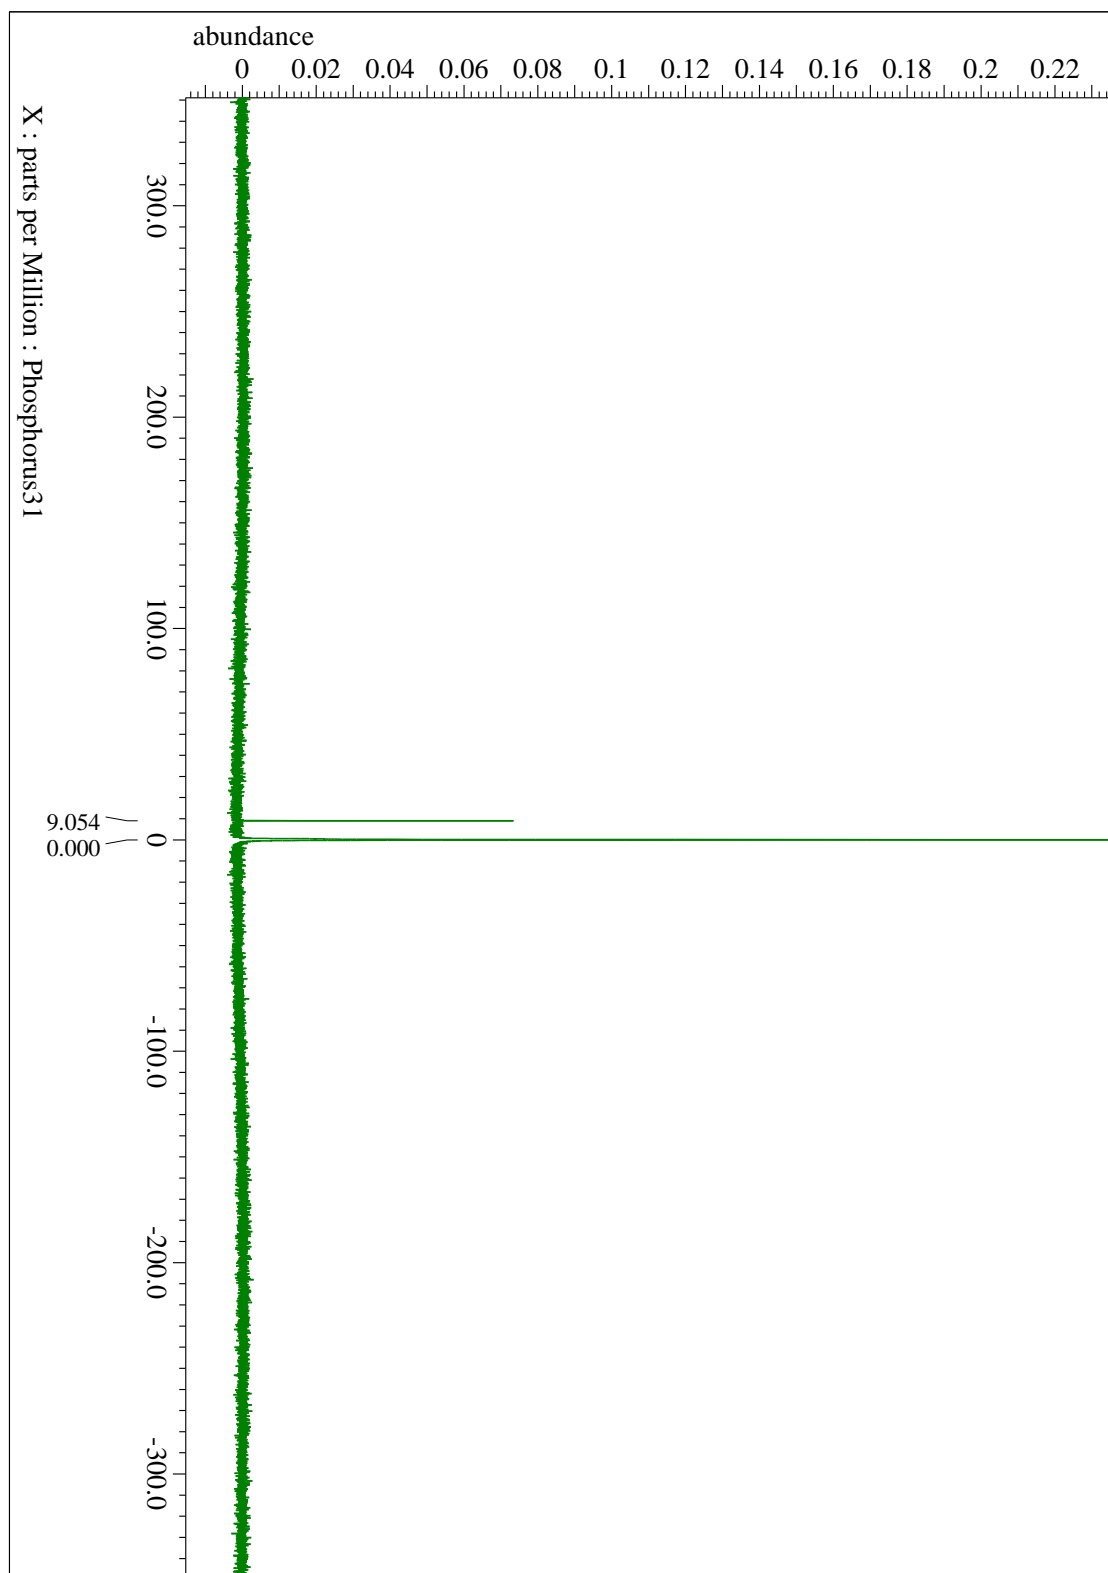

**Figure S11.**  $^{31}\text{P}$  NMR spectrum of *p*-dpeb in  $\text{CDCl}_3$  with phosphoric acid as an external standard (162 MHz).

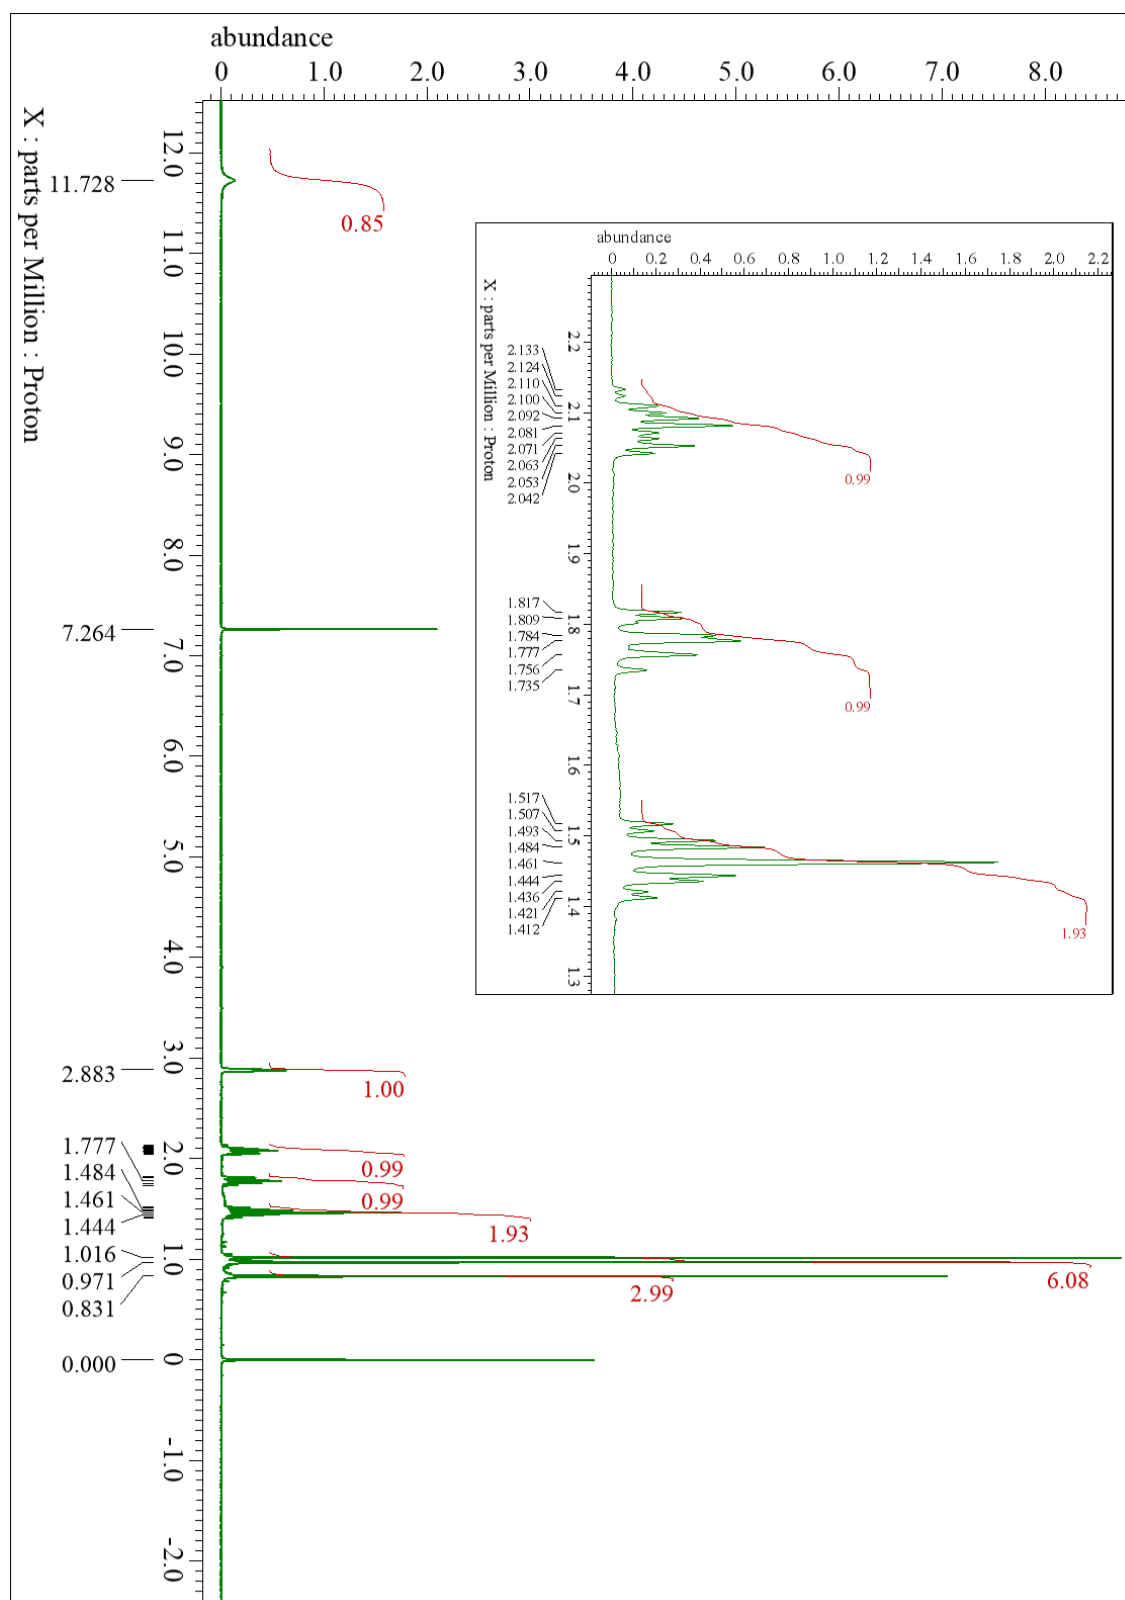

**Figure S12.**  $^1\text{H}$  NMR spectra of (+)-3-(pentafluoropropionyl)camphor in  $\text{CDCl}_3$  with TMS as an internal standard (400 MHz).



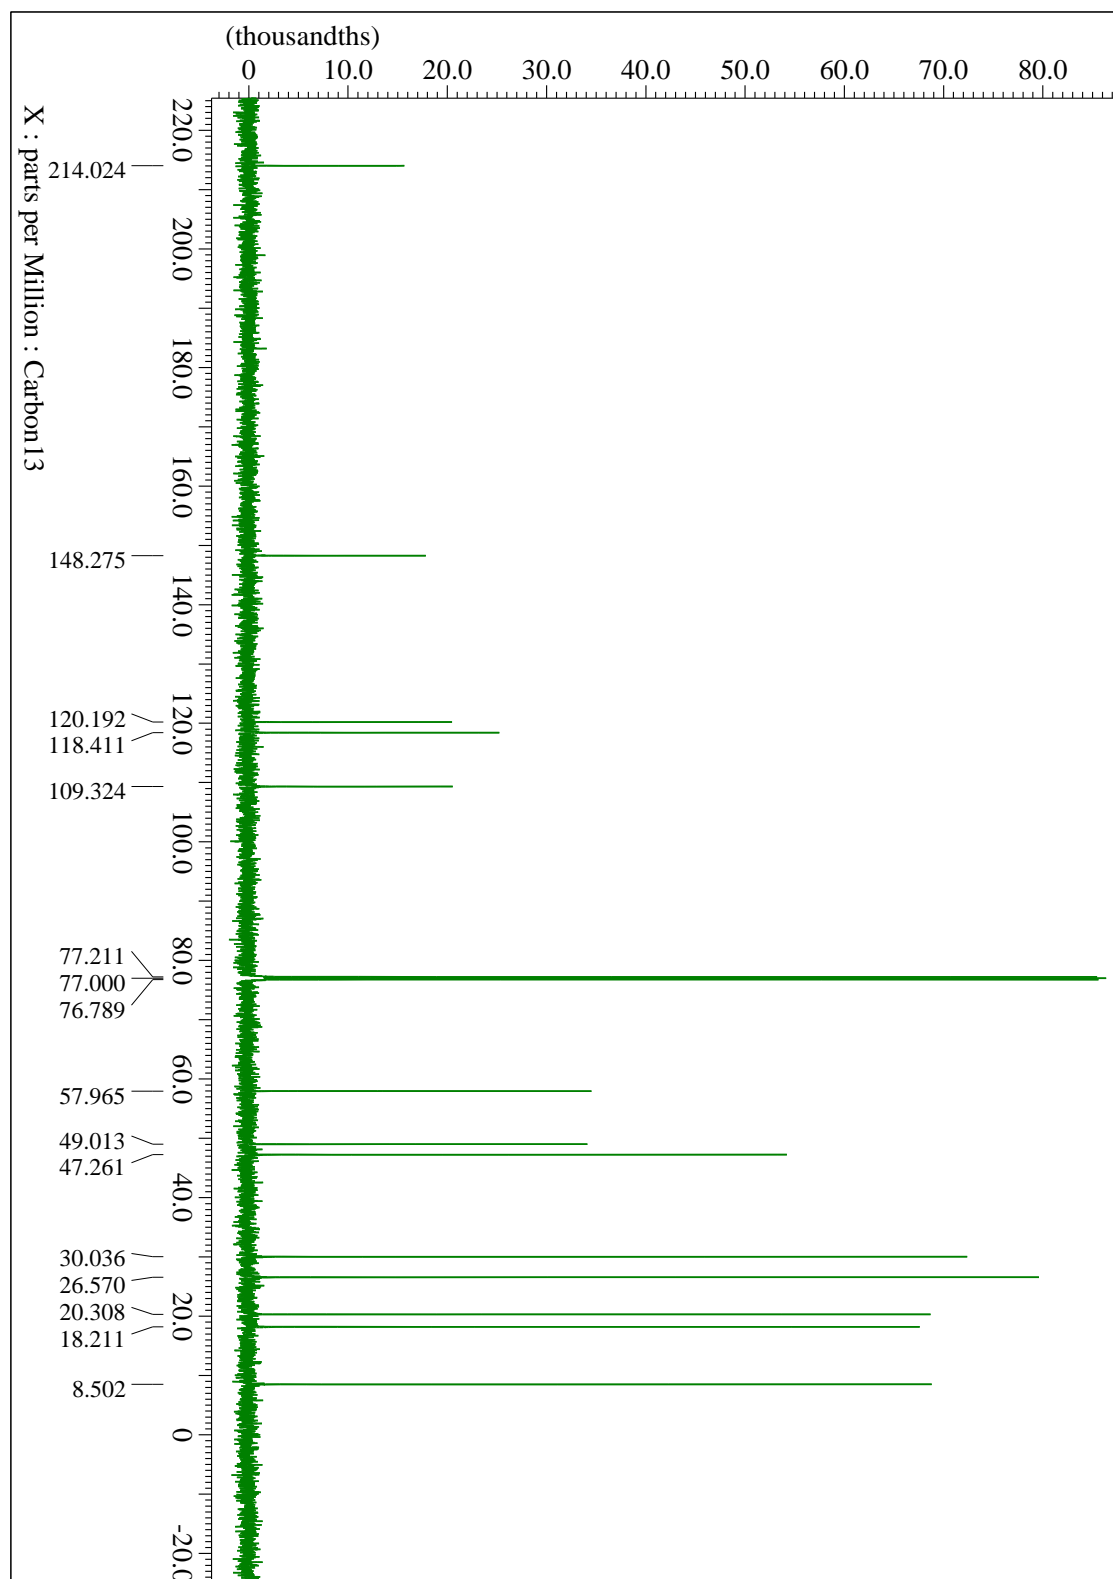

**Figure S13.**  $^{13}\text{C}$   $\{^1\text{H}, ^{19}\text{F}\}$  NMR spectrum of (+)-3-(pentafluoropropionyl)camphor in  $\text{CDCl}_3$  (151 MHz).

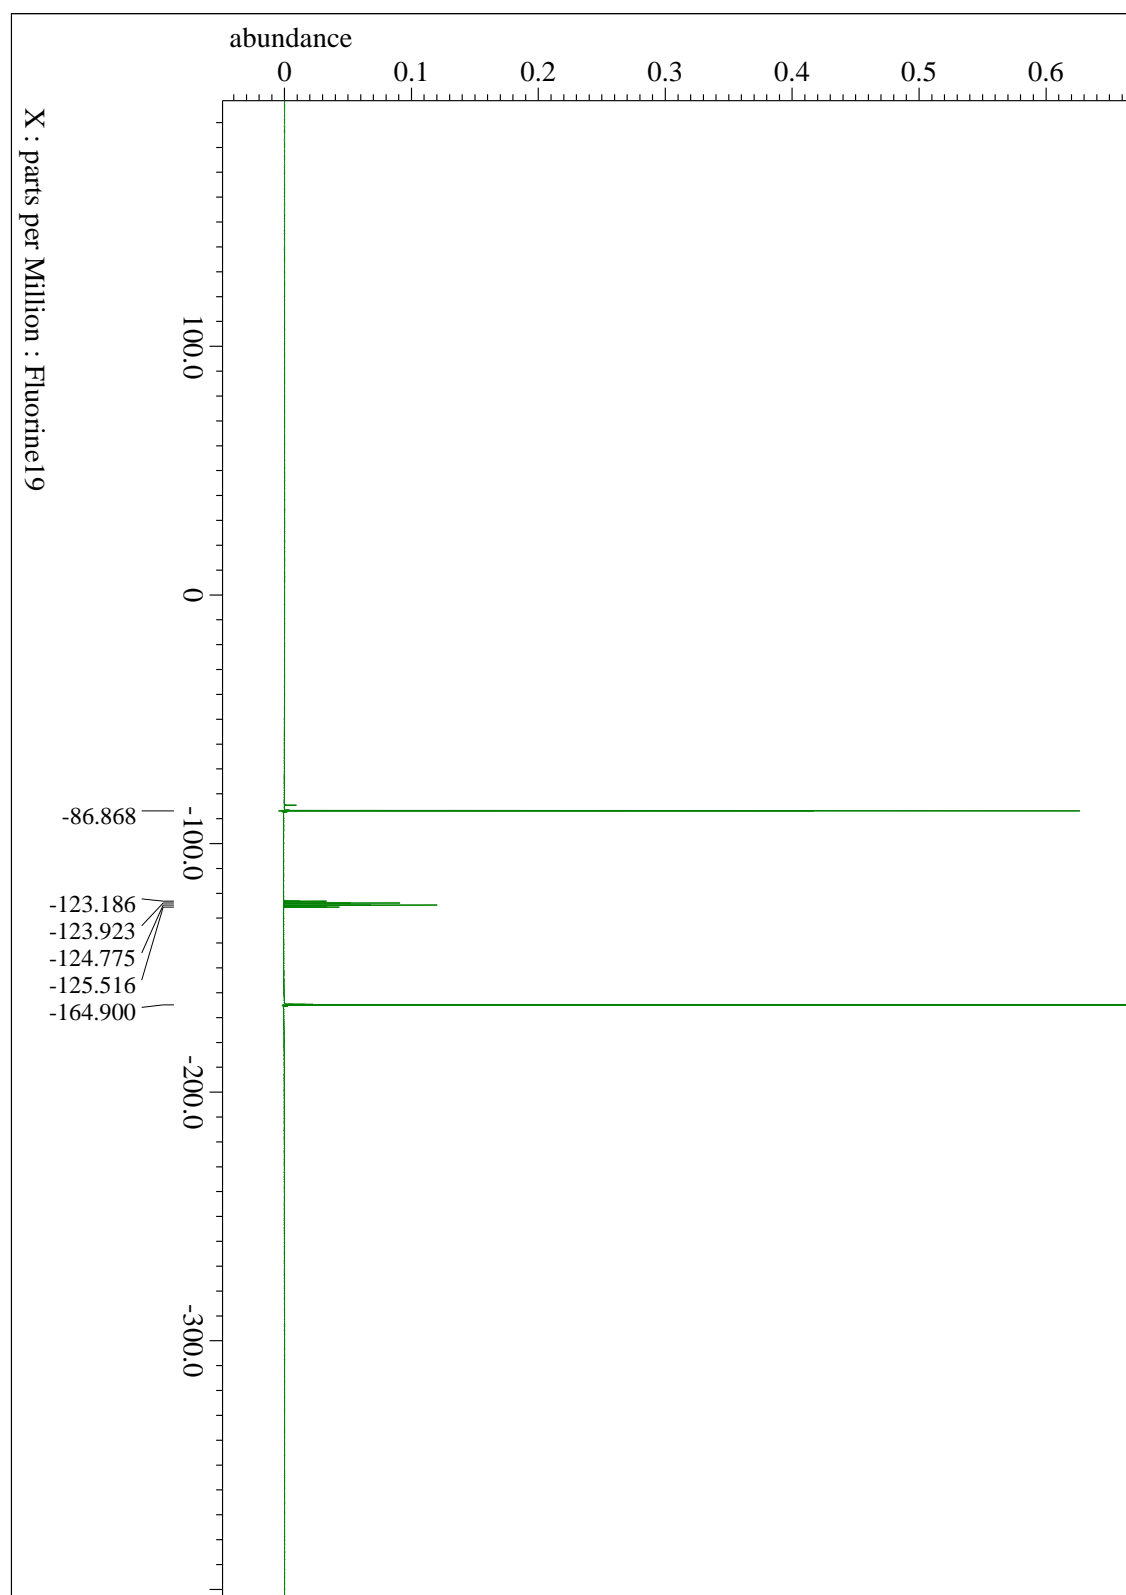

**Figure S14.**  $^{19}\text{F}$  NMR spectrum of (+)-3-(pentafluoropropionyl)camphor in  $\text{CDCl}_3$  with hexafluorobenzene as an internal standard (376 MHz).

## References

- S1 J. Olofsson, B. Önfelt and P. Lincoln, Three-state light switch of  $[\text{Ru}(\text{phen})_2\text{dppz}]^{2+}$ : Distinct excited-state species with two, one, or no hydrogen bonds from solvent, *J. Phys. Chem. A*, 2004, **108**, 4391–4398.
- S2 K. Miyata, Y. Konno, T. Nakanishi, A. Kobayashi, M. Kato, K. Fushimi and Y. Hasegawa, Chameleon Luminophore for Sensing Temperatures: Control of Metal-to-Metal and Energy Back Transfer in Lanthanide Coordination Polymers, *Angew. Chemie Int. Ed.*, 2013, **52**, 6413–6416.
- S3 M. Yamamoto, Y. Kitagawa, T. Nakanishi, K. Fushimi and Y. Hasegawa, Ligand-Assisted Back Energy Transfer in Luminescent TbIII Complexes for Thermosensing Properties, *Chem. Eur. J.*, 2018, **24**, 17719–17726.
